# Supplementary figures and images for: Dynamic Functional Connectivity of Emotion Processing in Beta Band with Naturalistic Emotion Stimuli
Source: MDPI journal article supplement (doi:10.3390/brainsci12081106), 2022-08-19

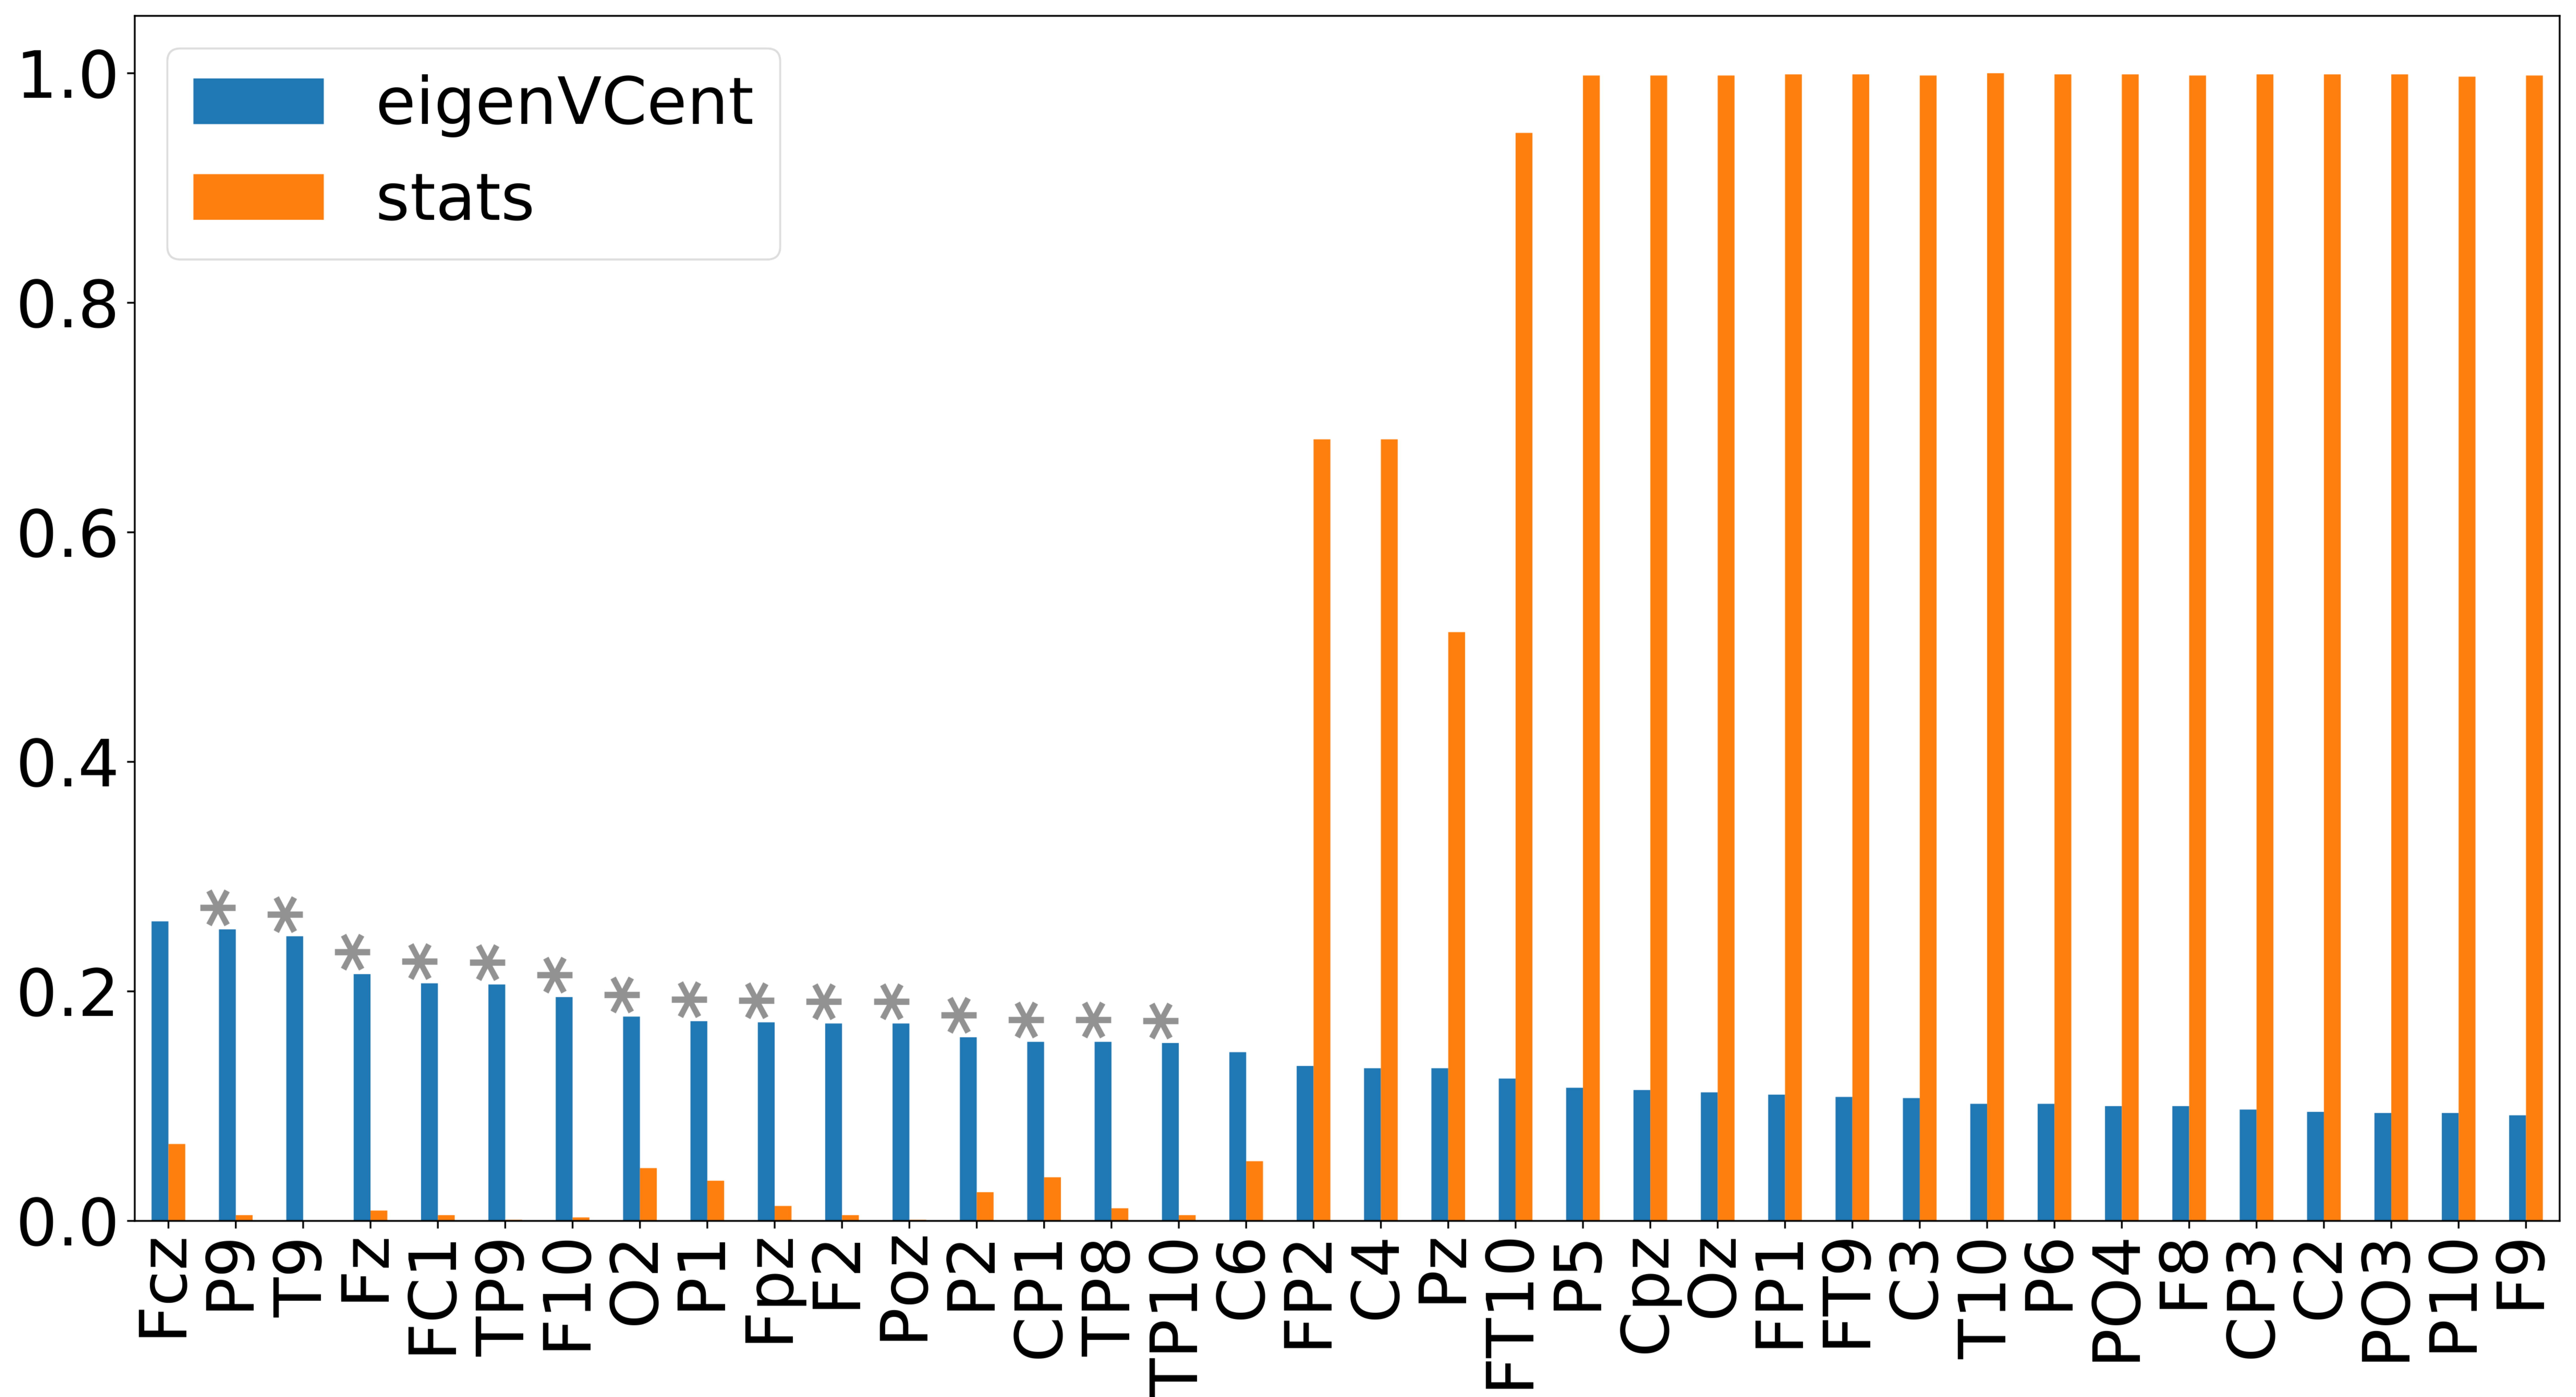

(a)

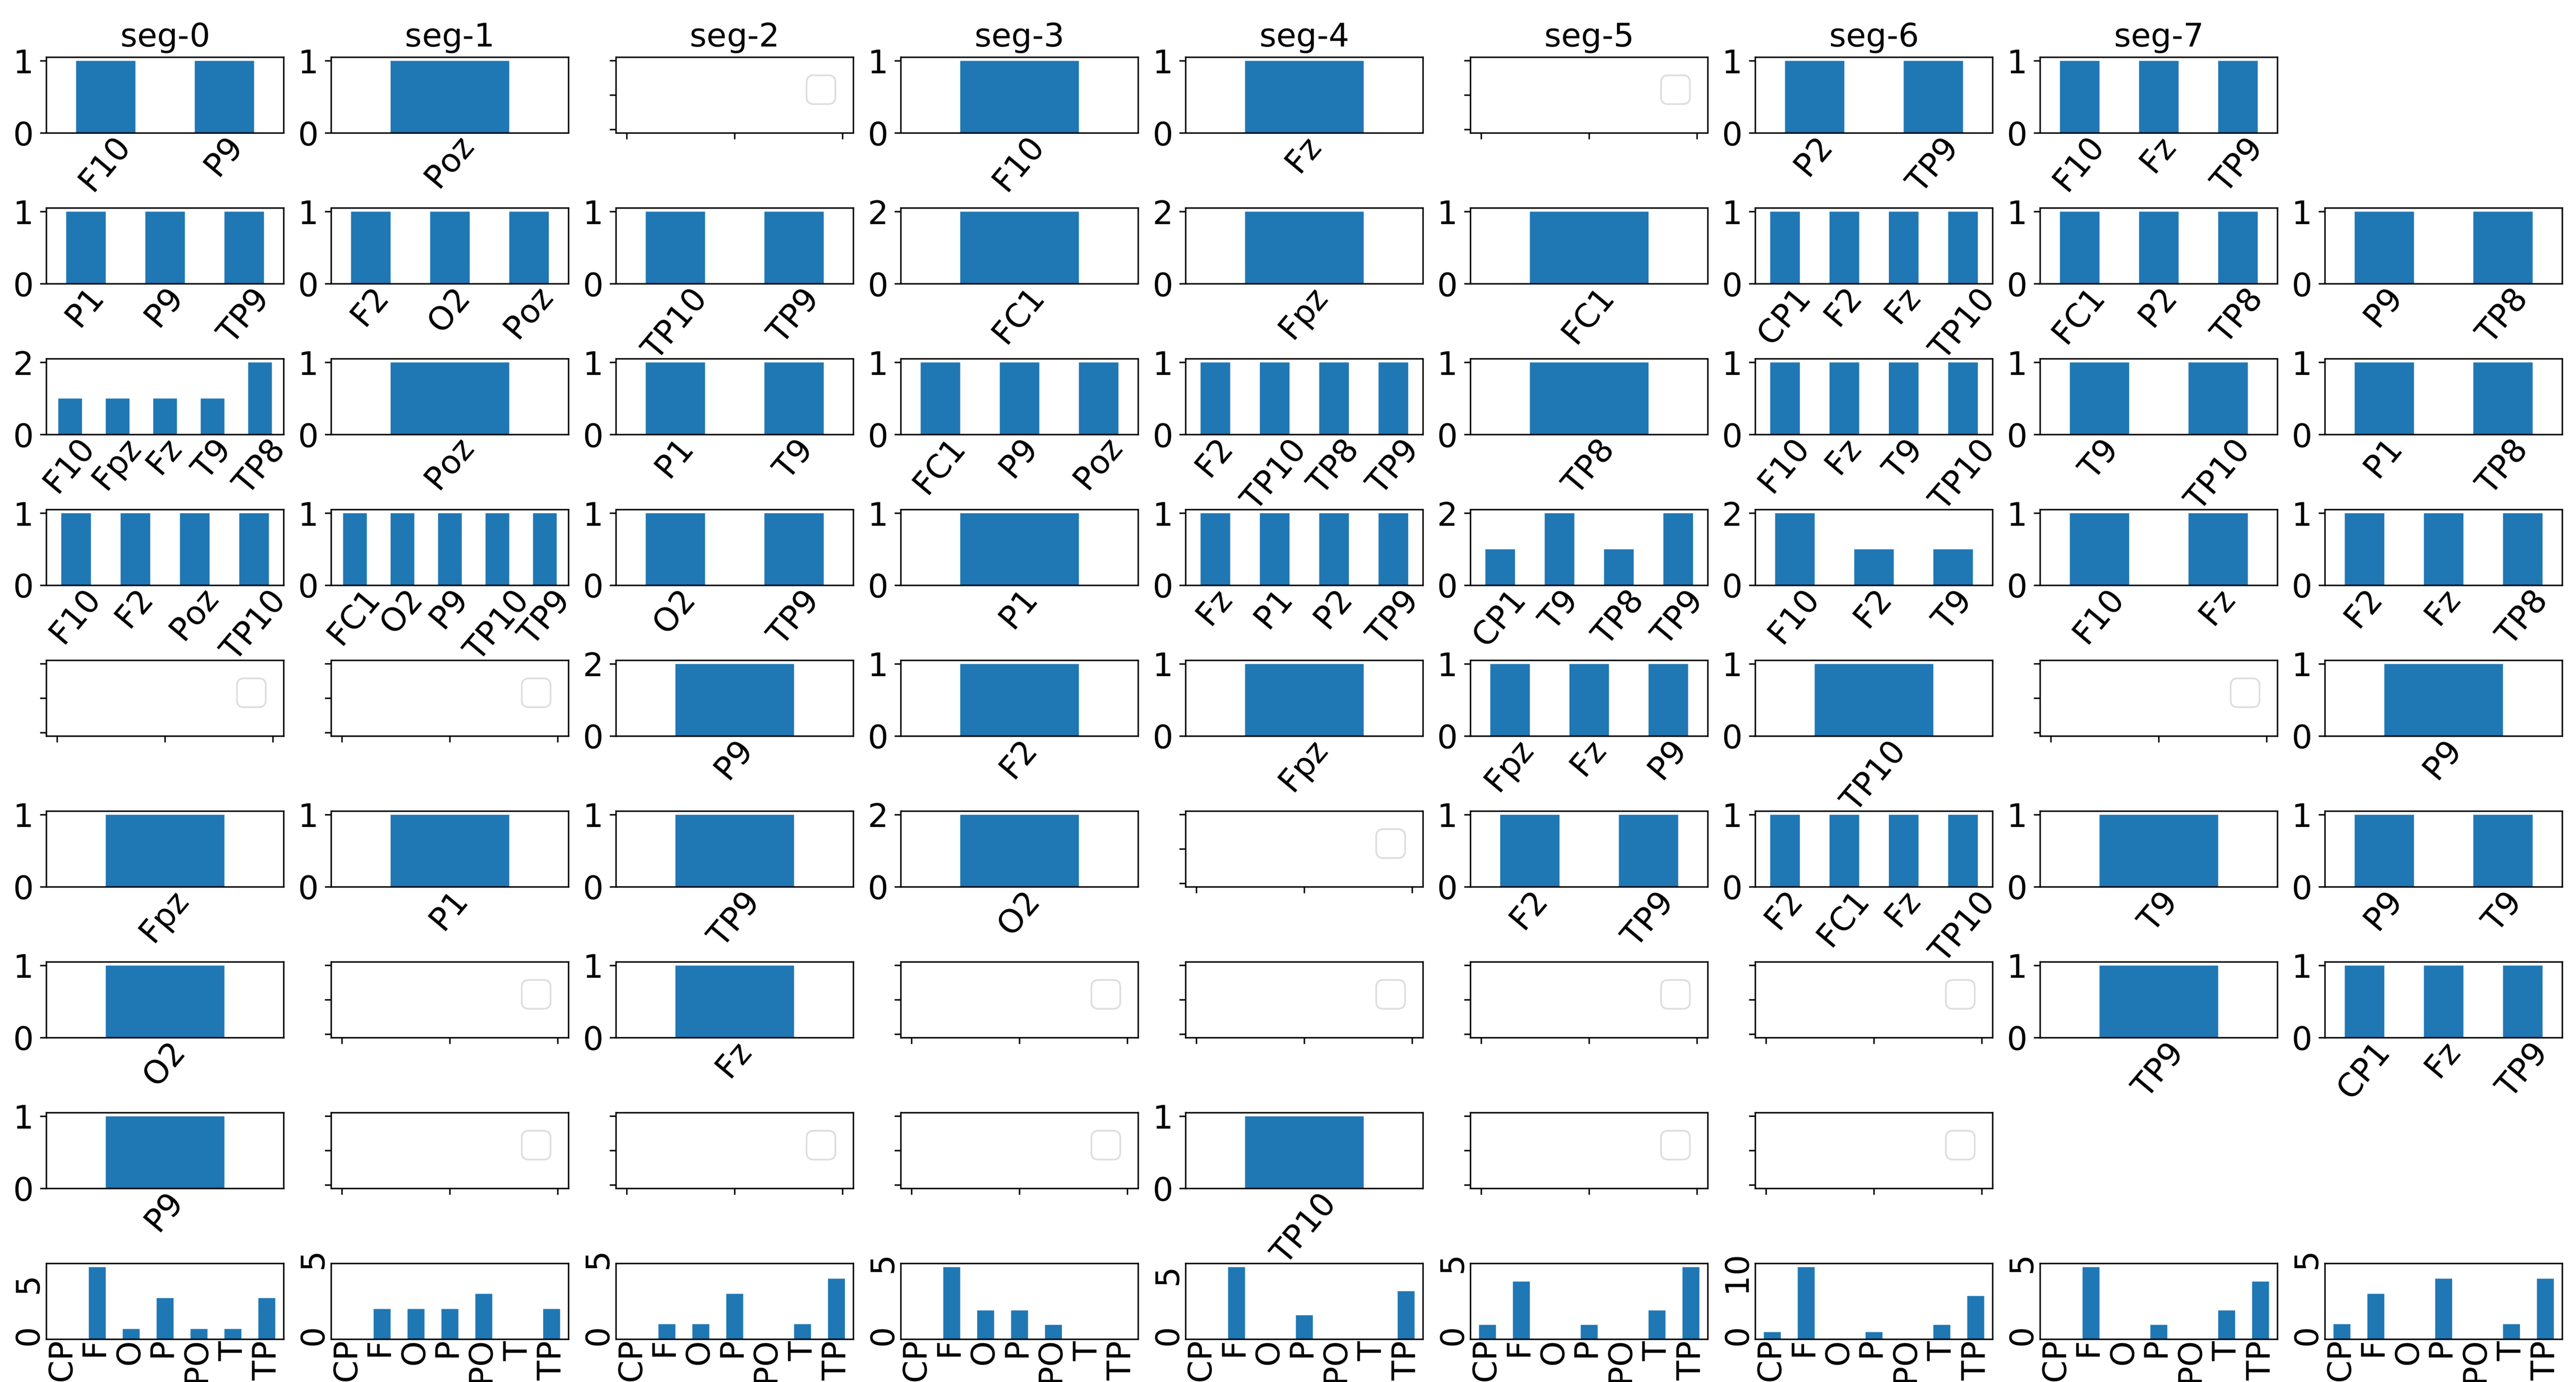

(b)

Supplement: s1 [file s1]

seg-0

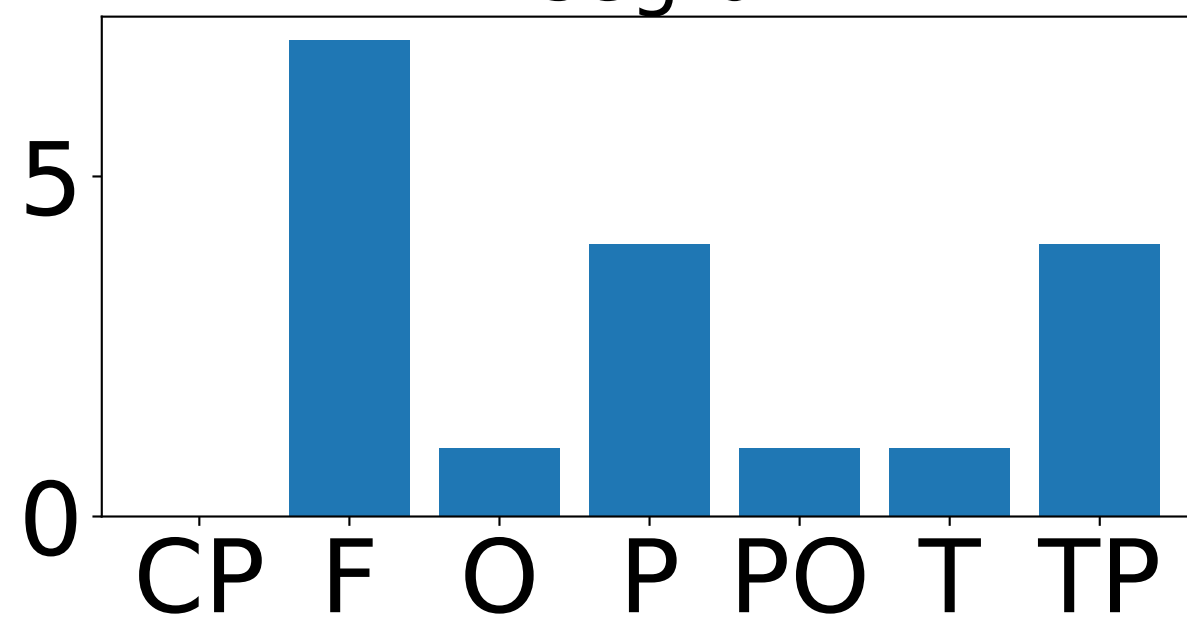

seg-1

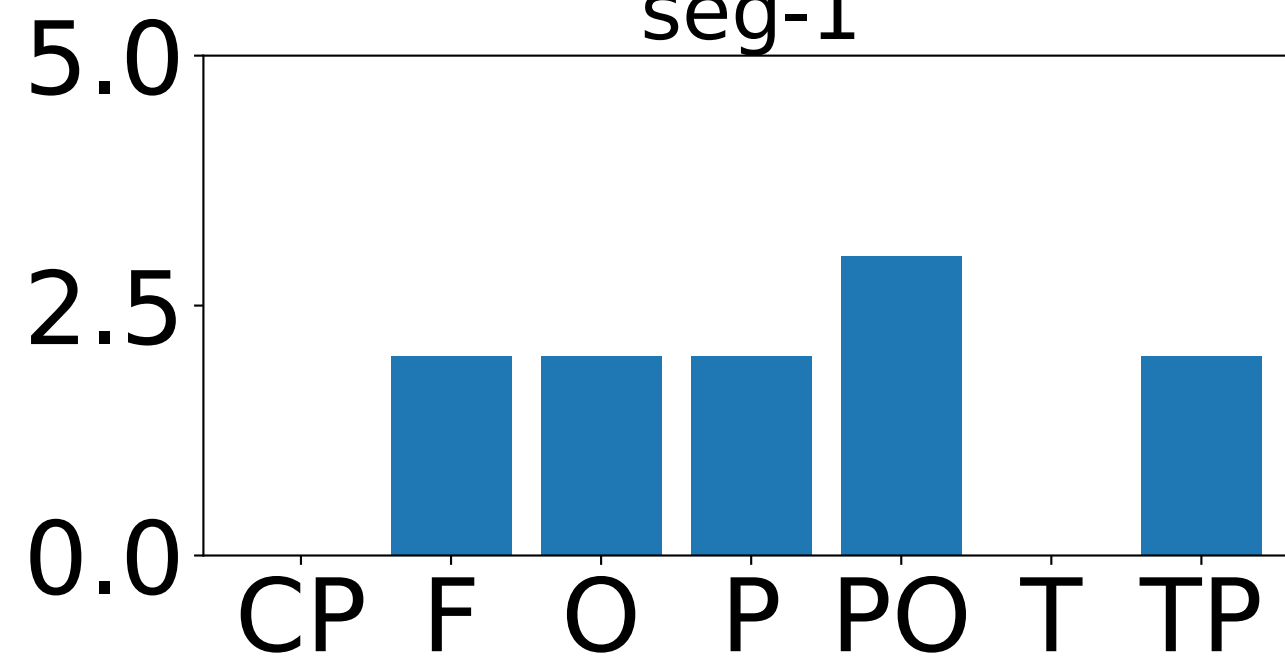

seg-2

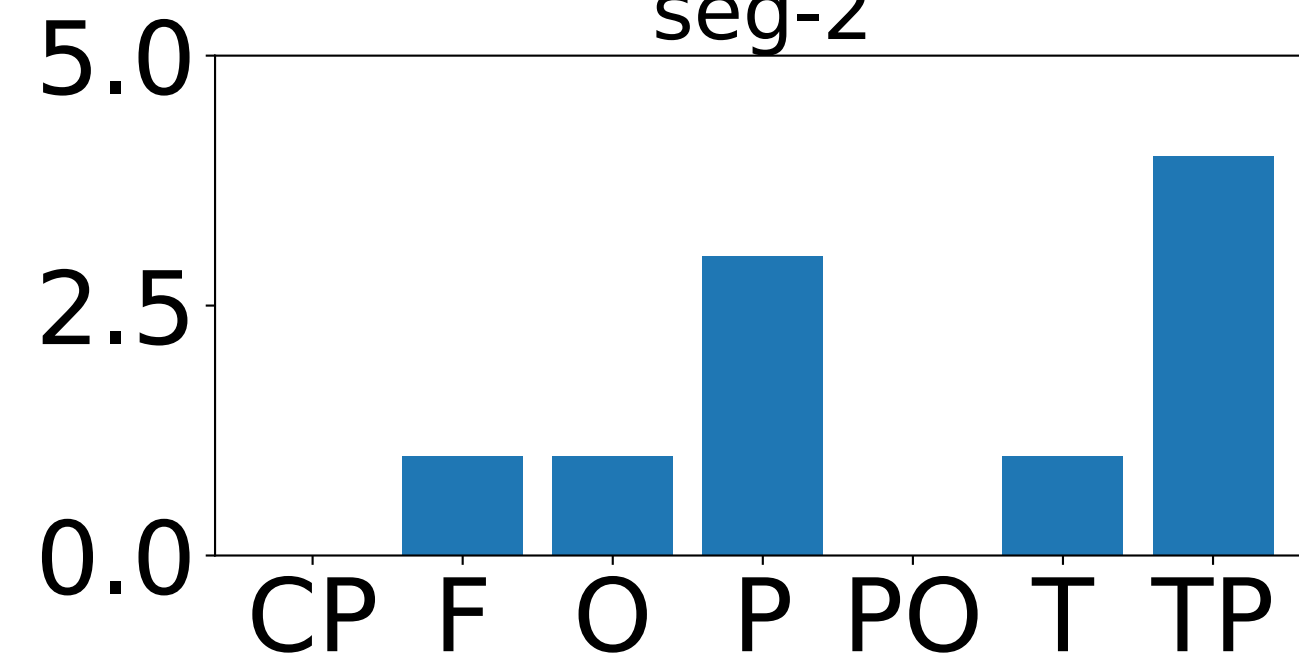

seg-3

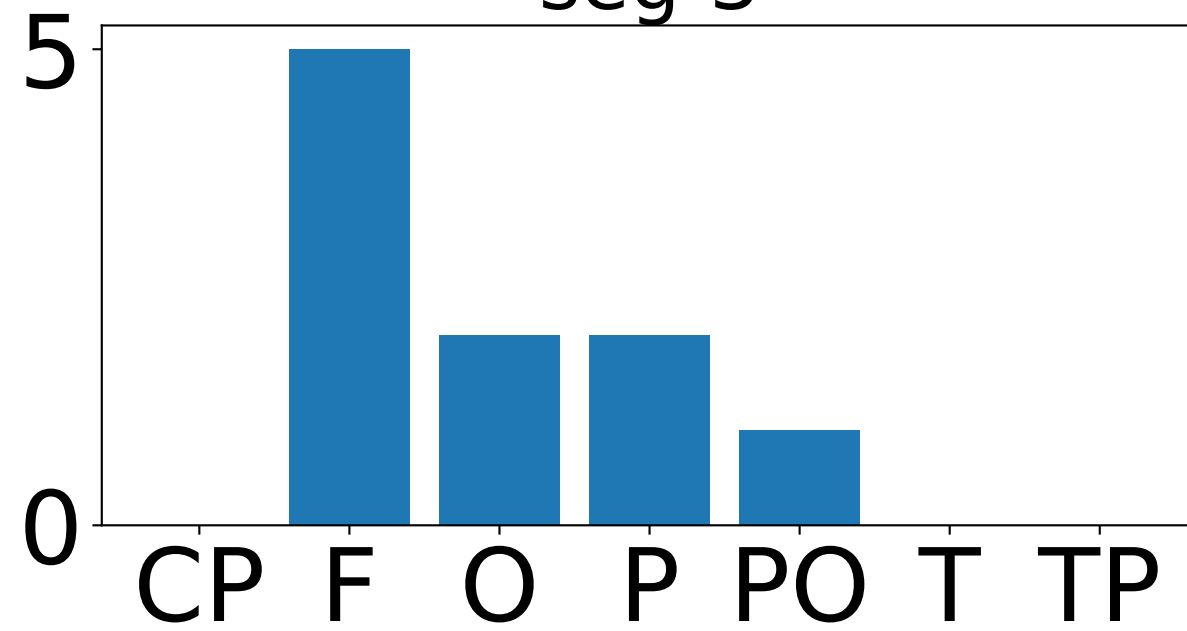

seg-4

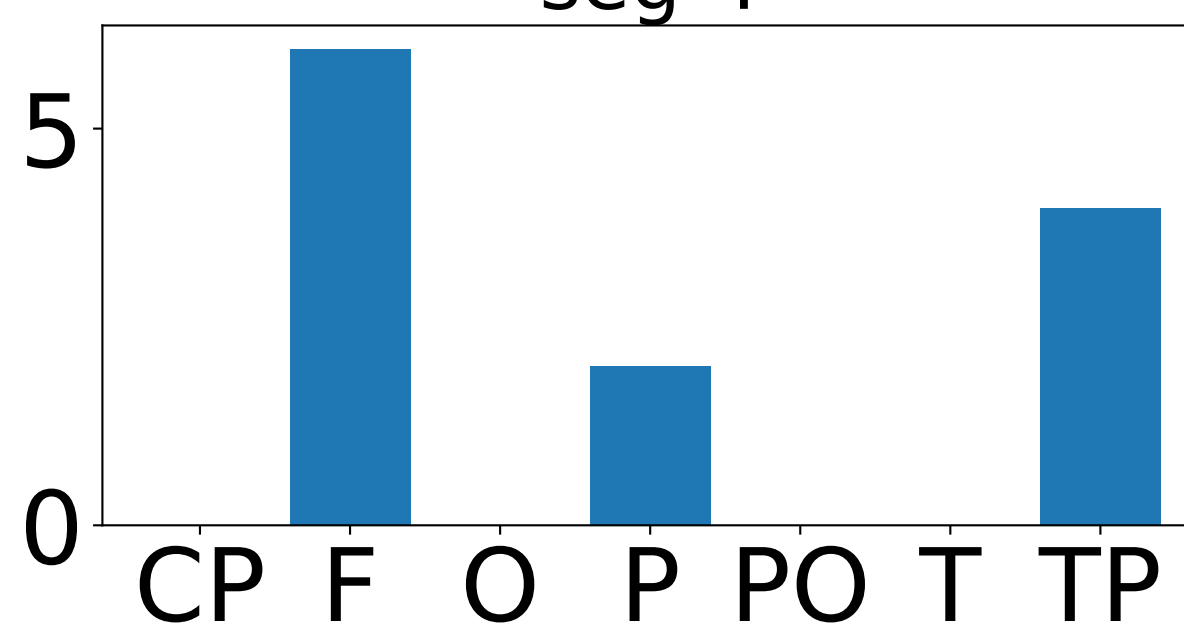

seg-5

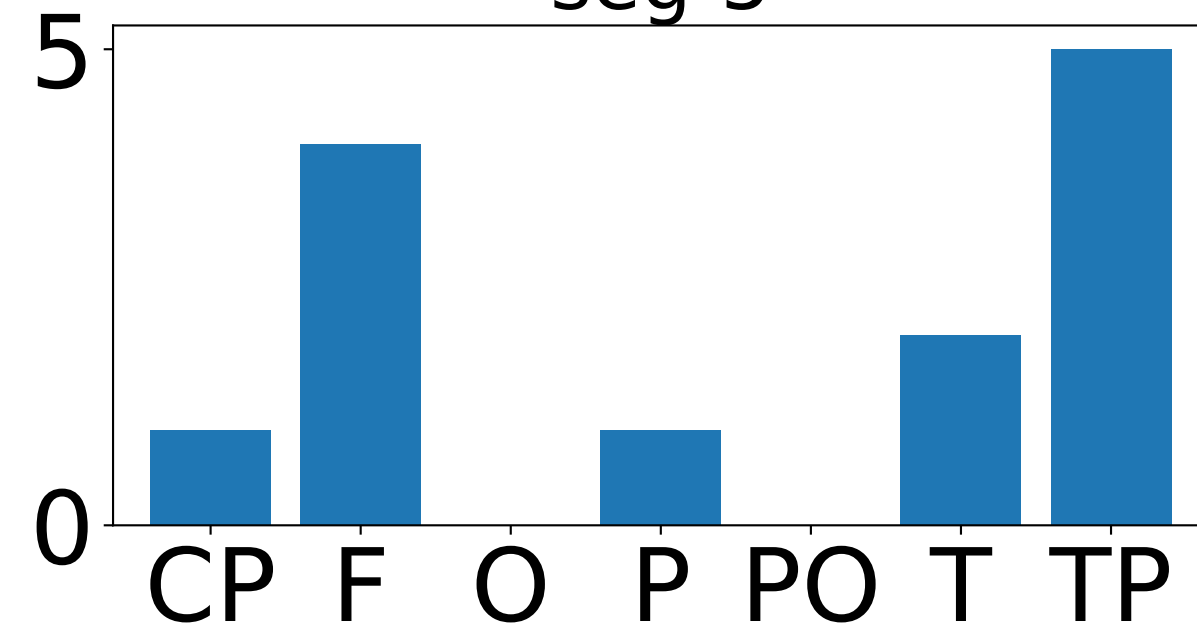

seg-6

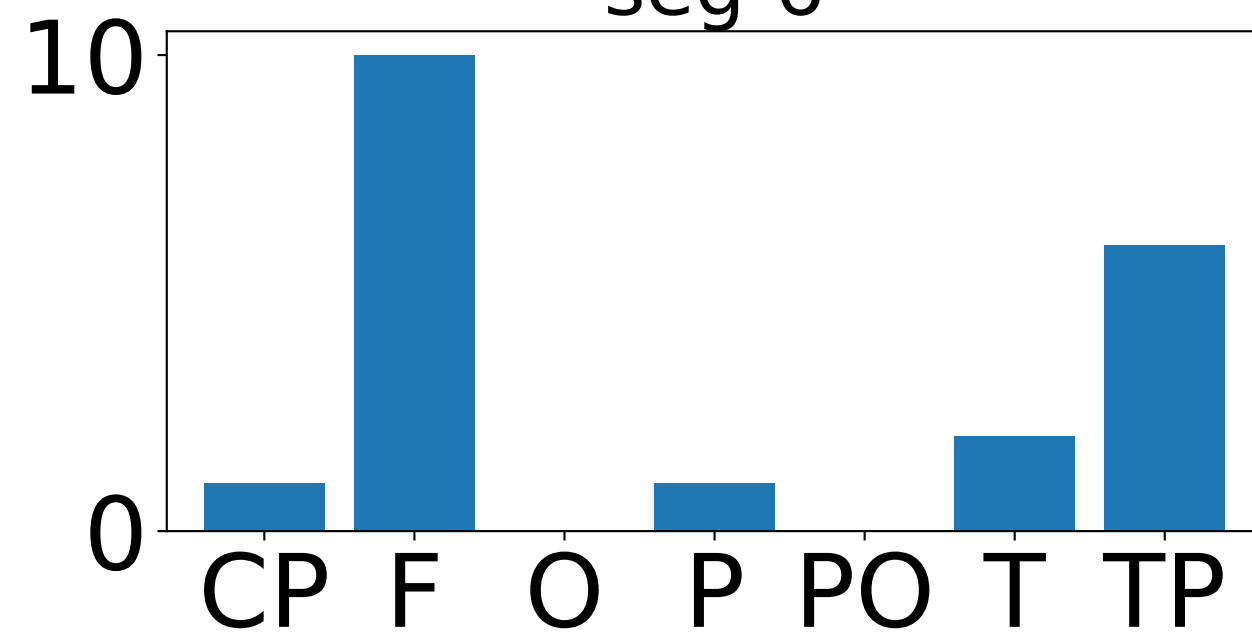

seg-7

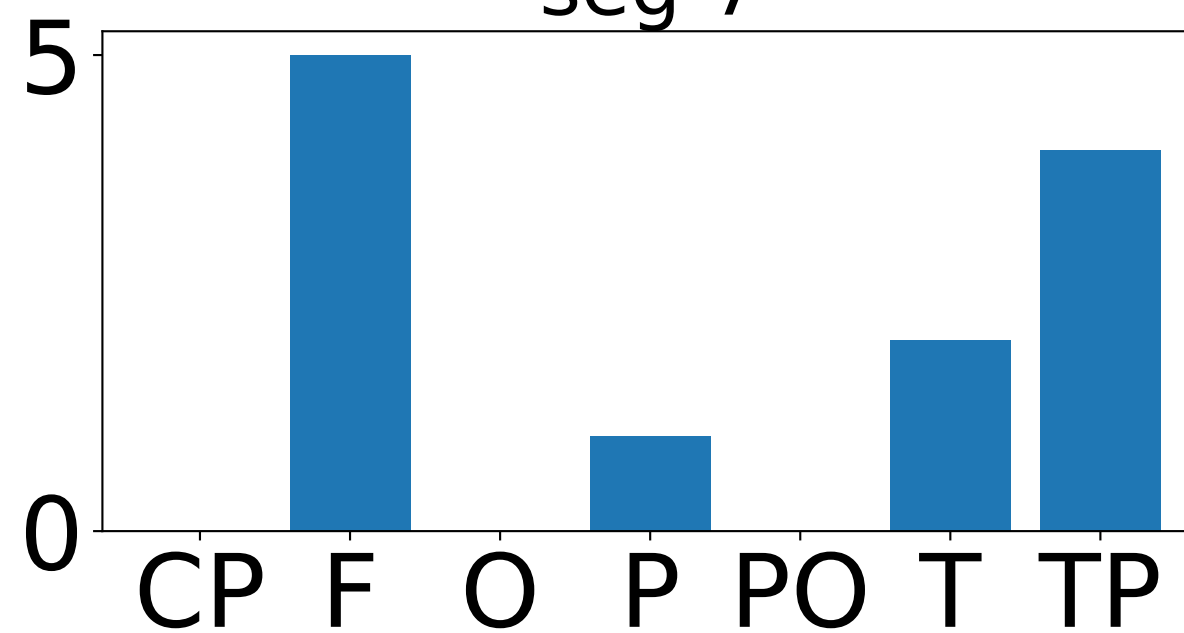

seg-8

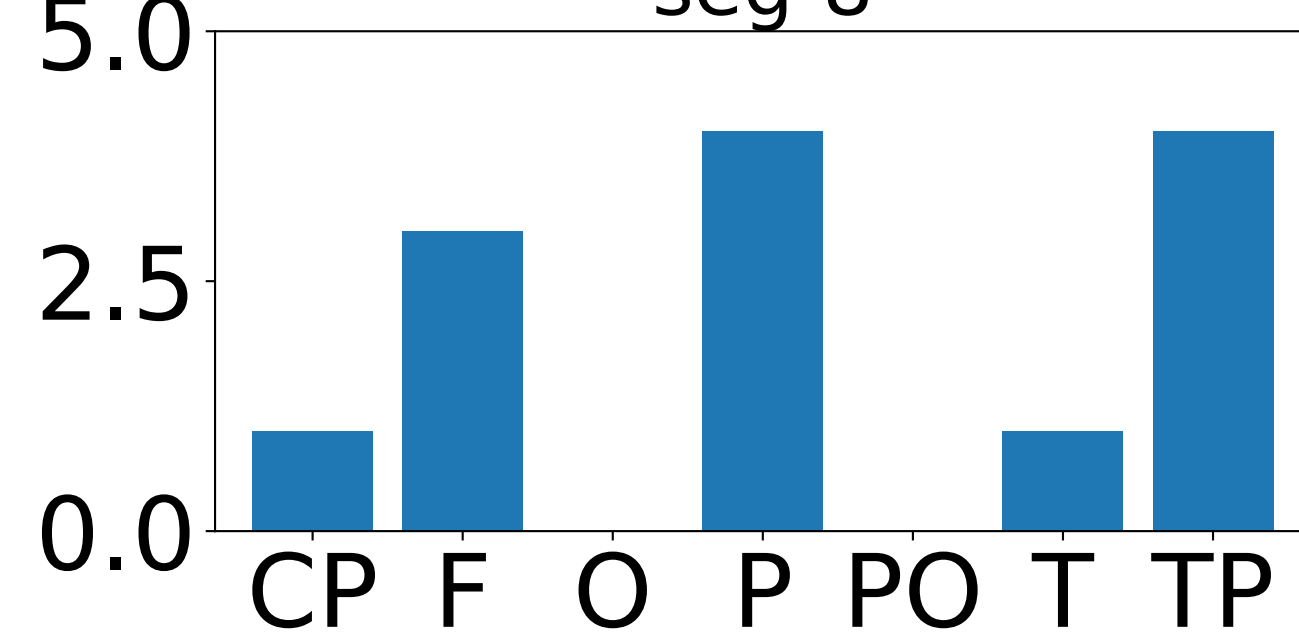

Supplement: s1 [file s1]
